# Supplementary material for: Biodiversity and temporal patterns of macrozoobenthos in a coal mining subsidence area in North China
Source: PeerJ. 2019 Feb 15;7:e6456. doi: 10.7717/peerj.6456 (PMC6378915; doi:10.7717/peerj.6456)
Supplement: Supplemental Information 1 [file peerj-07-6456-s001.xlsx]

## Sheet: environmental data
Wetland	Subsidence history	Sampling time	Area	Water temperature	Total dissolved solids	Salinity	Dissolved oxygen	pH	Oxidation reduction potential	Total nitrogen	Total phosphorus	chlorophyll-a
A	IS	2017-04-01	30.17	19.25	12.61	11.58	6.99	6.69	166.9	1.97449	0.242508	39.858
A	IS	2017-04-01	30.17	21.69	12.66	11.62	10.09	7.85	256.1	1.52567	0.200133	0
A	IS	2017-04-01	30.17	20.76	12.75	11.7	6.89	7.36	288.3	1.52211	0.284444	3.822
B	LS	2017-04-01	32.86	24.98	12.82	11.74	10.33	6.28	210.6	1.02211	0.106535	1.092
B	LS	2017-04-01	32.86	22.2	12.8	11.75	10.18	6.22	219.8	0.89966	0.080132	7.098
B	LS	2017-04-01	32.86	20.9	12.8	11.76	10.91	6.03	228.4	0.971088	0.080132	15.834
C	LS	2017-04-01	60.51	23.19	14.47	13.32	6.24	7.87	254.6	1.66233	0.1508	0
C	LS	2017-04-01	60.51	24.15	14.45	13.38	5.65	7.93	257.4	1.49233	0.128133	9.282
C	LS	2017-04-01	60.51	26.2	14.51	13.41	6.81	7.94	266.4	1.44233	0.1428	3.822
D	LS	2017-04-01	50.63	23.76	13.48	12.11	9.02	7.54	290.8	2.11395	0.330236	6.552
D	LS	2017-04-01	50.63	24.56	13.29	12.22	7.21	7.58	295.7	1.12075	0.130909	11.466
D	LS	2017-04-01	50.63	23.17	13.15	12.09	9.85	7.48	300.7	1.52551	0.164579	0.546
E	IS	2017-04-01	3.09	18.66	15.72	14.72	2.04	6.76	178.5	1.43027	0.131617	2.184
E	IS	2017-04-01	3.09	19.87	15.78	14.78	3.52	6.47	200	1.64796	0.136898	5.46
E	IS	2017-04-01	3.09	23.13	13.93	12.87	5.82	6.7	196	1.54252	0.0444884	0
F	IS	2017-04-01	5.82	27.58	14.44	13.32	12.48	7.08	193.4	1.51531	0.304554	1.638
F	IS	2017-04-01	5.82	22.16	13.32	12.29	9.02	6.17	143.6	1.19558	0.0418482	9.828
F	IS	2017-04-01	5.82	23.8	15.08	14.02	6.29	6.93	205.5	2.13095	0.629307	1.092
G	MS	2017-04-01	11.85	21.05	12.23	11.91	7.95	7.04	258.7	2.16497	0.339663	1.092
G	MS	2017-04-01	11.85	21.29	12.4	11.36	6.8	6.97	263.5	1.96769	0.520135	1.092
G	MS	2017-04-01	11.85	20.52	12.45	11.41	3.96	6.94	262.5	1.9915	0.402963	6.006
H	MS	2017-04-01	1.84	20.75	8.619	7.66	7.98	7.06	258.5	1.0085	0.103973	2.184
H	MS	2017-04-01	1.84	21.18	8.527	7.57	8.55	7	242.3	0.957483	0.101279	2.73
H	MS	2017-04-01	1.84	20.49	8.515	7.56	7.58	7.1	265.3	0.879252	0.0985859	2.73
I	MS	2017-04-01	6.88	25.52	9.181	8.17	14.03	6.69	213.7	1.54252	0.154059	0.546
I	MS	2017-04-01	6.88	26.91	9.365	8.33	9.45	7.46	264.2	1.69218	0.137643	0.546
I	MS	2017-04-01	6.88	25.39	9.434	8.41	1.4	7.41	164	1.80102	0.0864646	1.092
A	IS	2017-07-01	30.17	29.2	11.9	10.77	2.5	8.53	108.5	1.82551	0.222353	164.346
A	IS	2017-07-01	30.17	28.62	11.69	10.57	3.17	8.39	88.4	1.39592	0.159604	16.926
A	IS	2017-07-01	30.17	28.32	11.62	10.51	0.75	8.66	82.4	1.65102	0.197228	58.422
B	LS	2017-07-01	32.86	31.73	11.13	9.98	6.75	9.02	130.8	0.912245	0.104706	23.478
B	LS	2017-07-01	32.86	30.89	11.1	9.96	7.28	9.16	137.4	1.01939	0.122353	36.036
B	LS	2017-07-01	32.86	30.51	11.14	10	5.85	8.95	141.9	1.03469	0.143922	20.748
C	LS	2017-07-01	60.51	29.74	12.39	11.25	5.7	8.43	152.9	2.19694	0.339802	134.862
C	LS	2017-07-01	60.51	30.96	12.35	11.19	11.94	9.53	139.5	1.8602	0.32198	110.838
C	LS	2017-07-01	60.51	30.89	12.3	11.14	11.18	9.43	154.5	1.99286	0.31802	69.342
D	LS	2017-07-01	50.63	29.92	11.71	10.57	3.99	8.37	131.2	1.37551	0.177426	41.496
D	LS	2017-07-01	50.63	29.68	12.1	10.96	3.25	8.48	90.7	2.41122	0.51604	77.532
D	LS	2017-07-01	50.63	30.03	11.98	10.84	5.38	8.38	105.7	1.96224	0.300198	104.286
E	IS	2017-07-01	3.09	27.37	7.708	6.74	1.21	7.72	102.4	1.5449	0.449804	37.674
E	IS	2017-07-01	3.09	26.78	6.29	5.42	0.91	7.78	55.3	0.815306	0.0517647	9.282
E	IS	2017-07-01	3.09	27.45	6.767	5.86	1.82	8.16	88.3	1.25918	0.134118	36.582
F	IS	2017-07-01	5.82	28.3	9.846	8.77	5.35	8.3	39.6	1.5398	0.153725	20.202
F	IS	2017-07-01	5.82	30.78	10.04	8.93	12.13	8.54	90	1.38673	0.24	21.84
F	IS	2017-07-01	5.82	29.91	10.14	9.04	7.87	8.05	110.4	1.18776	0.0752941	20.748
G	MS	2017-07-01	11.85	26.27	9.699	8.92	0.66	6.5	54.6	2.41224	0.48499	34.398
G	MS	2017-07-01	11.85	27.63	10.07	9	1.24	6	98.6	1.63163	0.423604	13.65
G	MS	2017-07-01	11.85	26.57	8.914	7.9	1.16	5.5	92.2	1.26939	0.150337	12.012
H	MS	2017-07-01	1.84	27.04	9.315	8.28	0.13	7	47.7	0.866327	0.106772	12.012
H	MS	2017-07-01	1.84	26.89	9.088	8.06	0.15	6.5	13.6	0.794898	0.116673	13.104
H	MS	2017-07-01	1.84	27.04	9.221	8.19	0.96	7	93.3	1.00408	0.128554	41.496
I	MS	2017-07-01	6.88	27.11	6.02	5.16	3.52	7	111.3	0.697959	0.108752	12.012
I	MS	2017-07-01	6.88	29.38	5.625	4.79	4.69	6	132.3	0.754082	0.0968713	7.098
I	MS	2017-07-01	6.88	27.3	5.102	4.33	2.61	6	92.3	0.85102	0.316673	7.098
