# Supplementary material for: Biodiversity and temporal patterns of macrozoobenthos in a coal mining subsidence area in North China
Source: PeerJ. 2019 Feb 15;7:e6456. doi: 10.7717/peerj.6456 (PMC6378915; doi:10.7717/peerj.6456)
Supplement: Supplemental Information 2 [file peerj-07-6456-s002.xlsx]

## Sheet: Species abundance
			Nematodae sp.	Branchiura sowerbyi	Limnodrilus hoffmeisteri	Glossiphonia lata	Whitmania pigra	Cipangopaludina chinensis	Bellamya purificata	Gyraulus convexiusculus	Gyraulus compressus	Parafossarulus striatulus	Physa acuta	Radix lagotis	Radix swinhoei	Galba pervia	Galba turncatula	Alocinma longicornis	Polypylis hemisphaerula	Hippeutis cantori	Hippeutis umbilicalis	Chironomu splumosus	Hydrobaenus sp	Stictochironomus sp.	Einfeldia sp.	Dicrotendipes sp.	Orthocladius sp.	Psectrocladius sp.	Paratendipes sp.	Chaetocladius sp.	Cladopelma sp.	Diamesa sp.	Tvetenia sp.	Propsilocerusi sp	Chironmidae sp.	Tanytarsus sp.	Glyptotendipes sp.	Cricotopussp.	Endochironomus sp.	Polypedilum sp.	Cryptochironomus sp.	Clinotanypus sp.	Procladius sp.	Ablabesmyia sp.	Tanypus sp.	Culicoides sp.	Musca domestica	Tipulidae sp.	Hydrophilidae
Sampling time	Subsidence history	Wetland	-	GC	GC	PR	PR	SC	SC	SC	SC	SC	GC	GC	GC	SC	SC	SH	SH	SH	SH	GC	GC	GC	GC	GC	GC	GC	GC	GC	GC	GC	GC	GC	GC	FC	SH	SH	SH	SC	PR	PR	PR	PR	PR	PR	PR	PR	GC
2016-10-01	IS	A	0	0	0	0	0	0	0	0	0	0	0	21	0	0	0	0	0	0	0	28	0	0	0	0	0	0	0	0	0	0	0	1	0	0	623	0	0	0	0	0	0	0	0	0	0	0	0
2016-10-01	IS	A	0	0	0	0	0	0	0	0	0	0	4	1	0	0	0	0	0	0	0	8	0	0	12	0	0	0	0	0	0	0	0	0	0	0	44	0	0	2	0	0	0	0	0	0	0	0	0
2016-10-01	IS	A	0	0	0	0	0	0	0	0	0	0	0	0	0	0	0	0	0	0	0	125	0	0	180	0	0	0	0	0	0	0	0	2	0	0	427	0	0	0	0	0	0	0	0	0	0	0	0
2016-10-01	LS	B	0	0	3	0	0	0	0	0	0	0	0	0	0	0	0	0	0	0	0	0	0	0	0	0	0	0	0	0	0	0	0	5	0	0	0	0	0	0	0	0	0	0	2	2	0	0	0
2016-10-01	LS	B	0	0	31	0	0	0	0	0	0	0	0	0	0	0	0	0	0	0	0	0	0	0	0	0	0	0	0	0	0	0	0	2	0	0	2	0	0	0	0	0	0	0	0	0	0	0	0
2016-10-01	LS	B	0	0	16	0	0	0	0	0	0	0	0	0	0	0	0	0	0	0	0	0	0	0	1	0	0	0	0	0	0	0	0	2	0	0	0	0	0	0	0	0	0	0	0	0	0	0	0
2016-10-01	LS	C	0	1	3	0	0	0	0	0	0	0	0	0	0	0	0	0	0	0	0	49	0	0	0	0	0	0	0	0	0	0	0	11	0	0	4	0	0	0	0	0	0	0	0	0	8	0	0
2016-10-01	LS	C	0	0	0	0	0	0	0	0	0	0	0	0	0	0	0	0	0	0	0	17	0	0	0	0	0	0	0	0	0	0	0	24	0	0	2	0	0	0	0	0	0	0	0	0	5	0	0
2016-10-01	LS	C	0	0	14	0	0	0	0	0	0	0	0	0	0	0	0	0	0	0	0	8	0	0	0	0	0	0	0	0	0	0	0	3	0	0	0	0	0	0	0	0	0	0	0	1	0	0	0
2016-10-01	LS	D	0	0	2	0	0	0	0	0	0	0	0	0	0	0	0	0	0	0	0	1	0	0	7	0	0	0	0	0	0	0	0	2	0	0	8	0	0	0	0	0	0	0	12	0	0	0	0
2016-10-01	LS	D	0	1	13	0	0	0	0	0	0	0	0	0	0	0	0	0	0	0	0	0	0	0	3	0	0	0	0	0	0	0	0	12	0	0	0	0	0	0	0	0	0	0	57	0	0	0	0
2016-10-01	LS	D	0	0	11	0	0	0	0	0	0	0	0	0	0	0	0	0	0	0	0	0	0	0	0	0	0	0	0	0	0	0	0	10	0	0	1	0	0	0	1	0	0	0	0	0	0	0	0
2016-10-01	IS	E	0	0	0	0	0	0	0	0	0	0	5	0	0	0	0	0	0	4	0	63	0	0	54	0	0	0	1	0	0	0	0	0	3	2	61	0	0	0	0	0	0	0	0	0	0	0	0
2016-10-01	IS	E	0	0	1	0	0	0	0	0	0	0	1	3	0	0	0	0	0	0	0	14	0	0	9	0	0	0	0	0	0	0	0	0	0	6	13	0	0	2	0	0	0	0	0	0	0	0	0
2016-10-01	IS	E	0	0	0	0	0	0	0	0	0	0	3	0	0	0	0	0	0	11	0	4	0	0	4	0	0	0	0	0	0	0	0	0	0	1	34	0	0	0	0	0	0	0	0	0	0	0	0
2016-10-01	IS	F	0	7	0	0	0	0	0	0	0	0	0	0	0	0	0	0	0	6	0	114	0	0	69	0	0	0	0	0	0	0	0	0	1	21	53	0	0	45	0	0	4	0	0	0	0	0	0
2016-10-01	IS	F	0	12	0	0	0	0	0	0	0	0	0	0	0	0	0	0	0	2	0	308	0	0	145	0	0	0	0	0	0	0	0	0	3	22	25	1	0	177	0	0	0	0	0	0	0	0	0
2016-10-01	IS	F	0	1	11	0	0	0	0	0	0	0	0	0	0	0	0	0	0	0	0	1130	0	0	124	0	0	0	0	0	0	0	0	2	5	0	13	6	0	47	0	0	0	0	0	0	0	0	0
2016-10-01	MS	G	0	0	0	1	0	0	0	97	0	0	29	23	0	7	0	0	0	66	0	124	0	0	25	0	0	0	0	0	0	0	0	0	0	3	20	0	0	0	0	0	1	0	0	0	0	0	0
2016-10-01	MS	G	0	19	0	0	0	0	0	1	0	0	2	0	0	0	0	0	0	4	0	65	0	0	1	0	0	0	0	0	0	0	0	0	0	0	4	0	0	0	0	0	0	0	0	0	0	0	0
2016-10-01	MS	G	0	2	0	0	0	0	0	0	0	0	4	0	0	0	0	0	0	1	0	59	0	0	0	0	0	0	0	0	0	0	0	0	0	0	2	0	0	0	0	0	0	0	0	0	0	0	0
2016-10-01	MS	H	0	0	8	0	0	0	3	0	0	3	0	1	0	0	0	0	0	2	1	38	0	0	89	0	0	0	0	0	0	0	0	0	0	8	157	0	0	0	0	0	0	0	0	0	0	0	0
2016-10-01	MS	H	0	1	1	0	0	1	0	1	0	2		4	0	0	0	0	0	0	1	5	0	0	99	0	0	0	0	0	0	0	0	0	0	0	202	0	0	0	0	0	0	0	0	0	0	0	0
2016-10-01	MS	H	0	0	0	0	0	0	1	0	0	3	0	1	0	0	0	0	0	0	0	19	0	0	56	0	0	0	0	0	0	0	0	0	0	0	61	0	0	0	0	0	0	0	0	0	0	0	0
2016-10-01	MS	I	0	11	0	0	0	0	0	0	0	0	0	19	0	0	0	0	0	2	8	19	0	0	1	0	0	0	0	0	0	0	0	0	0	0	0	0	0	2	0	0	3	0	0	0	1	0	0
2016-10-01	MS	I	0	32	1	0	0	0	1	0	0	1	0	7	0	0	0	0	0	0	0	14	0	0	1	0	0	0	0	0	0	0	0	0	0	0	2	0	0	24	0	0	0	0	0	0	0	0	0
2016-10-01	MS	I	0	0	2	0	0	0	0	0	0	0	0	7	0	0	0	0	0	0	6	19	0	0	18	0	0	0	0	0	0	0	0	0	0	8	3	0	0	25	0	0	5	0	1	0	0	0	0
2017-01-01	IS	A	3	0	0	0	0	0	0	1	0	0	0	21	0	0	0	0	0	0	0	135	0	0	4	1	0	0	0	0	0	0	0	4	0	0	370	0	0	0	0	0	0	0	0	0	0	0	0
2017-01-01	IS	A	0	0	0	0	1	0	0	0	0	0	0	5	0	0	0	0	0	0	0	64	0	0	3	0	0	0	0	0	0	0	0	7	0	0	64	0	0	0	0	0	0	0	9	0	0	0	0
2017-01-01	IS	A	0	0	0	0	0	0	0	0	0	0	0	27	0	0	0	0	0	0	0	23	0	0	1	24	0	0	0	0	0	0	0	5	0	0	51	0	0	0	0	0	0	0	31	0	0	0	0
2017-01-01	LS	B	0	0	65	0	0	0	1	0	0	0	0	0	0	0	0	0	0	0	0	0	0	0	2	0	0	0	0	0	0	0	0	25	0	0	0	0	0	0	0	0	0	0	0	0	0	0	0
2017-01-01	LS	B	1	0	0	0	0	0	0	0	0	0	0	0	0	0	0	0	0	0	0	8	0	0	1	0	0	0	0	0	0	0	0	34	0	0	24	0	0	14	0	0	0	0	0	0	0	0	0
2017-01-01	LS	B	0	0	13	0	0	0	0	0	0	0	0	0	0	0	0	0	0	0	0	162	0	0	1	0	0	0	0	0	0	0	0	44	0	0	55	0	0	23	0	0	6	0	0	0	0	0	0
2017-01-01	LS	C	2	1	7	0	0	0	0	0	0	0	0	0	0	0	0	0	0	0	0	72	0	0	0	0	0	0	0	0	0	0	0	40	0	0	1	0	0	0	0	0	0	0	0	1	0	0	0
2017-01-01	LS	C	9	0	3	0	0	0	0	0	0	0	0	0	0	0	0	0	0	0	0	25	0	0	0	0	0	0	0	0	0	0	0	37	0	0	0	0	0	0	0	0	0	0	0	0	0	0	0
2017-01-01	LS	C	1	1	1	1	2	0	0	0	0	0	0	1	0	0	0	0	0	0	0	103	0	0	1	1	0	0	0	0	0	0	0	35	0	0	142	1	0	0	0	0	1	0	0	0	0	0	0
2017-01-01	LS	D	1	0	4	0	0	0	0	0	0	0	0	0	0	0	0	1	0	0	0	0	0	0	0	0	0	0	0	0	0	0	0	1	0	0	0	0	0	0	0	0	0	0	4	2	0	0	0
2017-01-01	LS	D	1	2	2	0	0	0	0	0	0	0	0	0	0	0	0	0	0	0	0	2	0	0	11	0	0	0	0	0	0	0	0	0	0	0	0	0	0	0	0	0	0	0	14	1	0	0	0
2017-01-01	LS	D	0	0	3	0	0	0	0	0	0	0	0	0	0	0	0	0	0	0	0	0	0	0	0	0	0	0	0	0	0	0	0	1	0	0	0	0	0	0	0	0	0	0	0	0	0	0	0
2017-01-01	IS	E	0	0	0	0	0	0	0	0	0	0	1	1	0	0	0	0	0	0	1	1	0	0	4	0	0	0	0	0	0	0	0	0	0	0	4	0	0	0	0	0	0	0	0	0	0	0	0
2017-01-01	IS	E	0	0	0	0	0	0	0	0	0	0	20	5	0	4	0	0	0	16	2	6	0	0	1	0	1	0	0	0	0	0	0	0	0	0	1	0	0	3	0	0	0	0	0	0	0	0	0
2017-01-01	IS	E	0	0	0	0	0	0	0	0	0	0	11	0	0	5	0	0	0	0	0	7	0	0	24	0	0	0	0	0	0	0	0	0	0	0	0	0	0	30	0	0	0	0	0	0	0	0	0
2017-01-01	IS	F	0	6	1	0	0	0	0	0	0	0	0	0	0	0	0	0	0	0	0	202	0	0	0	0	0	0	0	0	0	0	1	1	0	0	38	1	0	3	0	0	2	0	3	1	0	0	0
2017-01-01	IS	F	0	1	0	0	0	0	0	1	0	0	1	1	0	0	0	0	0	1	0	15	0	0	0	0	0	0	0	0	0	0	0	0	0	0	28	0	0	2	0	0	2	0	0	0	0	0	0
2017-01-01	IS	F	0	0	0	0	0	0	0	0	0	0	0	0	0	0	0	0	0	0	0	42	0	0	0	0	0	0	0	0	0	0	0	0	0	0	4	0	0	0	0	0	0	0	0	0	0	0	0
2017-01-01	MS	G	0	0	0	0	0	0	0	0	0	0	2	2	0	1	0	0	0	3	1	20	0	0	23	0	0	0	0	0	0	0	0	0	0	0	0	0	0	0	0	0	1	0	0	0	0	0	0
2017-01-01	MS	G	0	0	0	0	0	0	0	0	0	0	0	0	0	0	0	0	0	0	0	6	0	0	0	0	0	0	0	0	0	0	0	3	0	0	0	0	0	0	0	0	0	0	0	0	0	0	0
2017-01-01	MS	G	0	0	0	0	0	0	0	0	0	0	8	0	0	0	0	0	0	0	7	19	0	0	25	0	0	0	0	0	0	0	0	0	0	0	0	0	0	0	0	0	0	0	0	0	0	0	0
2017-01-01	MS	H	0	0	7	0	0	0	0	0	0	1	0	0	0	0	0	0	0	0	0	31	0	0	0	0	0	0	0	0	0	0	0	0	0	0	196	0	0	0	0	0	0	0	0	0	0	0	0
2017-01-01	MS	H	0	0	0	0	0	0	0	0	0	2	0	2	0	0	0	0	0	0	0	28	0	0	0	0	0	0	0	0	0	0	0	0	0	0	230	0	0	0	0	0	0	0	0	0	0	0	0
2017-01-01	MS	H	0	0	0	0	0	0	2	0	0	0	0	0	0	0	0	0	0	0	0	20	0	0	14	0	0	0	0	0	0	0	0	0	0	0	229	0	1	0	0	0	0	0	0	0	0	0	0
2017-01-01	MS	I	0	6	1	0	0	0	0	0	0	0	0	2	0	0	0	0	0	0	0	4	1	0	0	0	0	0	0	0	0	0	0	0	0	0	2	0	0	3	0	0	0	0	0	0	0	0	0
2017-01-01	MS	I	0	6	1	0	0	0	0	19	0	0	0	18	0	0	0	0	0	1	0	15	0	0	9	0	0	1	0	0	0	0	0	0	0	0	17	0	0	87	0	0	6	0	0	0	0	0	0
2017-01-01	MS	I	0	0	0	0	0	0	0	0	0	0	0	10	0	0	0	0	6	1	0	76	0	0	0	0	0	2	0	0	0	0	0	0	0	0	79	0	2	0	0	0	10	0	0	0	0	0	0
2017-04-01	IS	A	0	0	1	0	0	0	0	0	0	0	0	2	0	0	0	0	0	0	0	10	0	0	0	0	0	0	0	0	0	0	0	8	0	0	307	0	0	0	0	0	0	0	0	0	0	0	0
2017-04-01	IS	A	0	0	0	0	0	0	0	0	0	0	0	0	0	0	0	0	0	0	0	3	0	0	0	0	0	0	0	0	0	0	0	5	0	0	0	0	0	0	0	0	0	0	0	0	0	0	0
2017-04-01	IS	A	0	0	0	0	0	0	0	0	0	0	0	0	0	0	0	0	0	0	0	6	0	0	5	0	0	0	0	0	0	0	0	9	0	0	24	0	0	0	0	0	1	0	1	0	0	0	0
2017-04-01	LS	B	0	0	57	0	0	0	0	0	0	0	0	0	0	0	0	0	0	0	0	9	0	0	1	0	0	0	0	0	0	0	0	7	0	0	1	0	0	1	0	0	0	0	0	0	0	0	0
2017-04-01	LS	B	0	0	22	0	0	0	0	0	0	0	0	0	0	0	0	0	0	0	0	4	0	0	0	0	0	0	0	0	0	0	0	24	0	0	0	0	0	0	0	0	0	0	0	0	0	0	0
2017-04-01	LS	B	0	0	39	0	0	0	0	0	0	0	0	0	0	0	0	0	0	0	0	7	0	0	0	0	0	0	0	0	0	0	0	18	0	0	0	0	0	0	0	0	0	0	0	0	0	0	0
2017-04-01	LS	C	0	0	35	0	0	0	0	0	0	0	0	0	1	0	0	0	0	0	0	62	0	0	0	0	0	0	0	0	0	0	0	10	0	0	0	5	0	0	0	0	0	0	0	0	0	1	0
2017-04-01	LS	C	0	0	9	0	0	0	0	0	0	0	0	0	0	0	0	0	0	0	0	21	0	0	0	0	0	0	0	0	0	0	0	23	0	0	0	0	0	0	0	0	0	0	0	0	0	0	0
2017-04-01	LS	C	1	0	51	0	0	0	0	0	0	0	0	0	0	0	0	0	0	0	0	7	0	0	0	0	0	0	0	0	0	0	0	6	0	0	0	0	0	0	0	0	0	0	1	0	0	0	0
2017-04-01	LS	D	0	0	9	0	0	0	0	0	0	0	0	0	0	0	0	0	0	0	0	2	0	0	1	0	0	0	0	0	0	0	0	1	0	0	1	6	0	4	0	0	0	0	0	0	0	0	0
2017-04-01	LS	D	0	0	3	0	0	0	0	0	0	0	0	0	0	0	0	0	0	0	0	0	0	0	0	0	0	0	0	0	0	0	0	0	0	0	1	4	0	0	0	0	0	0	0	0	0	0	0
2017-04-01	LS	D	0	0	6	0	0	0	0	0	0	0	0	0	0	0	0	0	0	0	0	0	0	0	0	0	0	0	0	0	0	0	0	1	0	0	0	5	0	3	0	0	0	0	0	0	0	1	0
2017-04-01	IS	E	0	0	0	0	0	0	0	0	0	0	0	2	0	0	0	0	0	0	2	51	0	0	63	0	1	0	0	0	0	0	0	0	0	0	0	0	0	2	0	0	3	0	0	0	0	0	0
2017-04-01	IS	E	0	1	0	0	0	0	0	0	0	0	10	7	0	0	0	0	0	6	0	32	0	0	55	0	9	0	0	0	0	0	0	0	0	0	0	0	0	2	0	0	0	0	0	0	0	0	0
2017-04-01	IS	E	0	0	0	0	0	0	0	0	0	0	0	0	0	7	0	0	0	0	0	7	0	0	10	0	1	1	0	2	2	0	0	1	0	0	0	0	0	0	0	1	2	0	1	0	0	0	0
2017-04-01	IS	F	0	6	0	0	1	0	0	0	0	0	0	2	0	0	0	0	0	0	0	0	0	0	0	0	0	0	0	0	0	0	0	0	0	0	4	0	0	1	0	0	20	0	5	0	0	0	0
2017-04-01	IS	F	0	0	0	0	1	0	0	0	5	0	0	13	0	0	0	0	0	6	0	0	0	0	0	0	0	0	0	0	0	0	2	0	0	0	73	0	0	1	0	0	22	0	18	0	0	0	0
2017-04-01	IS	F	0	0	1	0	0	0	0	0	0	0	2	8	0	0	0	0	0	0	0	9	0	0	0	0	0	0	0	0	0	0	4	0	0	0	45	9	0	103	0	0	10	0	0	0	0	0	0
2017-04-01	MS	G	0	0	0	0	1	0	0	0	10	0	1	10	0	4	0	0	0	0	0	54	0	1	0	0	1	0	0	0	4	0	26	0	0	0	388	0	0	1	0	0	53	0	0	0	0	0	0
2017-04-01	MS	G	0	0	1	0	1	0	0	0	9	0	2	10	0	0	0	0	0	0	0	284	0	0	0	0	0	0	0	0	4	0	21	1	0	0	109	0	0	0	0	0	27	0	0	0	0	0	0
2017-04-01	MS	G	0	0	0	0	0	0	0	0	33	0	25	109	0	0	2	0	0	0	0	31	0	0	0	0	0	0	0	0	0	1	5	9	0	0	214	0	0	0	0	0	15	0	4	0		0	0
2017-04-01	MS	H	0	0	1	0	0	1	3	0	0	2	0	1	0	0	0	1	0	0	0	3	0	0	0	0	0	0	0	0	0	0	0	0	0	0	38	0	0	0	0	0	0	0	0	0	0	0	0
2017-04-01	MS	H	0	3	0	0	0	1	2	0	0	1	0	1	0	0	0	0	0	0	0	2	0	0	0	4	0	0	0	0	0	0	0	0	0	0	3	41	0	6	0	0	0	0	0	0	0	0	2
2017-04-01	MS	H	0	0	3	0	0	1	1	0	1	2	0	2	0	0	0	0	0	0	0	2	0	0	0	0	0	0	0	0	0	0	0	0	0	0	9	0	0	0	0	0	0	0	0	0	0	0	0
2017-04-01	MS	I	0	67	0	0	0	0	0	0	5	1	0	15	0	0	0	0	0	0	0	0	0	0	0	0	0	0	0	0	0	0	2	0	0	0	0	0	0	0	0	0	0	0	0	0	0	0	0
2017-04-01	MS	I	0	0	1	0	0	0	0	0	72	0	1	6	0	2	0	0	0	8	0	3	0	0	1	18	19	0	0	0	0	0	62	0	0	0	62	0	0	0	0	0	7	2	0	0	0	0	0
2017-04-01	MS	I	0	0	0	0	0	0	1	0	10	0	0	27	0	0	0	0	0	6	0	0	0	0	0	0	0	0	0	0	0	0	4	0	0	0	6	0	0	0	0	0	11	0	0	0	0	0	0
2017-07-01	IS	A	0	1	2	0	0	0	0	0	0	0	0	0	0	0	0	0	0	0	0	1	0	0	0	0	0	0	0	0	0	0	0	8	0	0	12	0	0	0	0	0	0	0	0	0	0	0	0
2017-07-01	IS	A	0	0	0	0	0	0	0	0	0	0	0	0	2	0	0	0	0	0	0	12	0	0	0	0	0	0	0	0	0	0	0	10	0	0	24	0	0	0	0	0	0	0	0	0	0	0	0
2017-07-01	IS	A	0	0	0	0	0	0	0	6	0	0	0	1	2	0	0	0	0	0	0	0	0	0	0	0	0	0	0	0	0	0	0	4	0	0	0	0	0	0	0	0	0	0	0	0	0	0	0
2017-07-01	LS	B	0	0	47	0	0	0	0	0	0	1	0	0	0	0	0	0	0	0	0	8	0	0	75	0	0	0	0	0	0	0	0	2	0	1	18	0	0	1	0	0	0	0	0	0	0	0	0
2017-07-01	LS	B	0	4	93	0	0	0	0	0	0	0	0	0	0	0	0	0	0	0	0	1	0	0	0	0	0	0	0	0	0	0	0	8	0	0	5	0	0	0	0	0	0	0	4	2	0	0	0
2017-07-01	LS	B	0	0	93	0	0	0	0	0	0	0	0	0	0	0	0	0	0	0	0	1	0	0	16	0	0	0	0	0	0	0	0	18	0	0	0	0	0	0	0	0	0	0	3	3	0	0	0
2017-07-01	LS	C	0	0	105	0	0	0	0	0	0	0	0	0	0	0	0	0	0	0	0	30	0	0	0	0	0	0	0	0	0	0	0	4	0	0	0	0	0	0	0	0	0	0	6	0	0	0	0
2017-07-01	LS	C	0	0	133	0	0	0	0	0	0	0	0	0	0	0	0	0	0	0	0	38	0	0	0	0	0	0	0	0	0	0	0	10	0	0	0	0	0	0	0	0	0	0	5	0	0	2	0
2017-07-01	LS	C	0	2	180	0	0	0	0	0	0	0	0	1	0	0	0	0	0	0	0	51	0	0	0	0	0	0	0	0	0	0	0	5	0	0	0	0	0	0	0	0	0	0	0	0	0	0	0
2017-07-01	LS	D	0	0	2	0	0	0	0	0	0	0	0	0	0	0	0	0	0	0	0	4	0	0	3	0	0	0	0	0	0	0	0	0	0	0	4	0	0	0	0	0	0	0	0	0	0	0	0
2017-07-01	LS	D	0	12	93	0	1	0	1	0	0	0	0	0	0	0	0	0	0	0	0	6	0	0	0	0	0	0	0	0	0	0	0	0	0	0	0	0	0	0	0	0	0	0	0	0	0	0	0
2017-07-01	LS	D	0	0	20	0	0	0	0	0	0	0	0	0	0	0	0	0	0	0	0	32	0	0	0	0	0	0	0	0	0	0	0	1	0	0	3	0	0	0	0	0	0	0	1	0	0	0	0
2017-07-01	IS	E	0	0	0	0	0	0	0	0	0	0	0	0	0	0	0	0	0	0	0	1	0	0	0	0	0	0	0	0	0	0	0	0	0	1	0	0	0	0	0	0	0	0	0	0	0	0	0
2017-07-01	IS	E	0	0	0	0	0	0	0	0	0	0	0	0	0	0	0	0	0	0	0	4	0	0	0	0	0	0	0	0	0	0	0	0	0	2	0	0	0	0	0	0	0	0	0	0	0	0	0
2017-07-01	IS	E	0	0	0	0	1	0	0	0	0	0	0	3	0	0	0	0	0	0	0	4	0	0	1	0	0	0	0	0	0	0	0	0	0	2	1	0	0	0	0	0	0	0	0	0	0	0	0
2017-07-01	IS	F	0	0	0	0	0	0	0	0	0	0	0	0	0	0	0	0	0	0	0	0	0	0	0	0	0	0	0	0	0	0	0	0	0	0	0	0	0	0	0	0	0	0	0	0	0	0	0
2017-07-01	IS	F	0	0	0	0	0	0	0	0	0	0	0	0	0	0	0	0	0	0	0	0	0	0	0	0	0	0	0	0	0	0	0	0	0	0	0	0	0	0	0	0	0	0	1	0	0	0	0
2017-07-01	IS	F	0	1	0	0	0	0	0	0	0	0	0	0	0	0	0	0	0	0	0	2	0	0	1	0	0	0	0	0	0	0	0	0	0	0	0	0	0	0	0	0	0	0	0	0	0	0	0
2017-07-01	MS	G	0	0	0	0	0	0	0	3	0	0	9	9	0	0	0	0	0	6	0	10	0	0	1	0	0	0	0	0	0	0	0	0	0	2	0	0	0	0	0	0	0	0	0	0	0	0	0
2017-07-01	MS	G	0	0	0	0	0	0	0	0	0	0	2	5	0	0	0	0	0	0	0	14	0	0	2	0	0	0	0	0	0	0	0	3	0	0	0	0	0	0	0	0	0	0	0	0	0	0	0
2017-07-01	MS	G	0	0	0	0	0	0	0	0	0	0	0	17	0	1	0	0	0	0	0	2	0	0	15	0	0	0	0	0	0	0	0	19	0	0	1	0	0	0	0	0	0	0	0	0	0	0	0
2017-07-01	MS	H	0	0	1	0	0	0	0	0	0	0	0	0	0	1	0	0	0	1	0	0	0	0	0	0	0	0	0	0	0	0	0	0	0	0	0	0	0	0	0	0	0	0	0	0	0	0	0
2017-07-01	MS	H	0	0	0	0	0	0	1	0	0	0	0	0	0	0	0	0	0	0	0	0	0	0	0	0	0	0	0	0	0	0	0	1	0	0	0	0	0	0	0	0	0	0	0	0	0	0	0
2017-07-01	MS	H	0	0	69	0	0	0	0	0	0	1	0	0	0	0	0	0	0	0	0	0	0	0	3	0	0	0	0	0	0	0	0	1	0	0	0	0	0	0	0	0	0	0	0	0	0	0	0
2017-07-01	MS	I	0	10	2	0	0	0	0	3	0	0	0	6	0	11	0	0	0	2	0	0	0	0	0	0	0	0	0	0	0	0	0	0	0	0	0	0	0	0	0	0	0	0	0	0	0	0	0
2017-07-01	MS	I	0	11	3	0	0	0	0	5	0	0	0	1	0	6	0	0	0	1	0	0	0	0	0	0	0	0	0	0	0	0	0	0	0	0	0	0	0	0	0	0	1	0	0	0	0	0	0
2017-07-01	MS	I	0	8	1	0	0	0	0	2	0	0	0	0	0	2	0	0	0	1	0	0	0	0	0	0	0	0	0	0	0	0	0	0	0	0	0	0	0	0	0	0	2	0	0	0	0	0	0
[truncated: 21 more columns]
